# Supplementary material
Source: PubMed Central journal article supplement (PMC4869699)
Supplement: 125_2016_3917_MOESM2_ESM.pdf [file 125_2016_3917_MOESM2_ESM.pdf]

## **The ITN START Trial Study Team**

ITN San Francisco, CA: Mario Ehlers, Audrey Plough, Preeti Chugha, Carol Soppe, Lauren McCarthy. ITN Bethesda, MD: Kristina Harris, Sai Kanaparthi, Deborah Phippard, Tracia Debnam, Jorge Pardo, Noha Lim.

National Institute of Allergy and Infectious Diseases (NIAID), Bethesda, MD: Linna Ding, Peggy Lund-Fitzgibbon, Maria Veri, Lyudmila Lykah.

Rho Federal Systems Division, Chapel Hill, NC: Ashley Pinckney, Lynette Keyes-Elstein, LaSonia Morgan, Emily McFalls.

University of California, San Francisco, CA: Stephen Gitelman, Jeffrey Bluestone, Stephen Rosenthal, Saleh Adi, Marcia Wertz, Rebecca Wesch, Jeanne Buchanan, Kathleen Breen.

Barbara Davis Center, Aurora, CO: Peter Gottlieb, Alex Wiseman, Aaron Michels, Ray Gutin, Mary Voelmle, Laurie Weiner, Mara Schwartz, Amy Wallace, Jenna Lungaro, Heather Maurer, Joseph Daniels, Lisa Meyers.

Emory University, Atlanta, GA: Eric Felner, Mark Rigby, Sol Jacobs, Stephanie Meisner, Milton Brown, Nicholas Raviele, Greg Smallwood, Alleia Stokes, Cheryl Stone.

Children's Hospital of Philadelphia, Philadelphia, PA: Steven Willi, Olena Kucheruk, David Langdon, Pantea Minnock, Catherine Carchidi, Laureen Murphy.

Children's Hospital of Los Angeles, Los Angeles, CA: Lynda Fisher, Roshanak Monzavi, Mary Halvorson.

University of Minnesota, Minneapolis, MN: Antoinette Moran, Carrie Gibson, Anne Street, Janice Leschyshyn, Jennifer Smith, Brandon Nathan, John Wagner.

University of California, San Diego, CA: Michael Gottschalk, Marla Hashiguchi.

Children's Mercy Hospital, Kansas City, MO: Wayne Moore, SueEllen Weigel, Terri Luetjen, Lois Hester.

Children's Hospital Oakland, Oakland, CA: Tariq Ahmad, Betty Flores.
