# Supplementary material
Source: PubMed Central journal article supplement (PMC4869699)

**Supplementary Figure 1.** CONSORT diagram showing allocation and disposition of study participants in the START Trial.

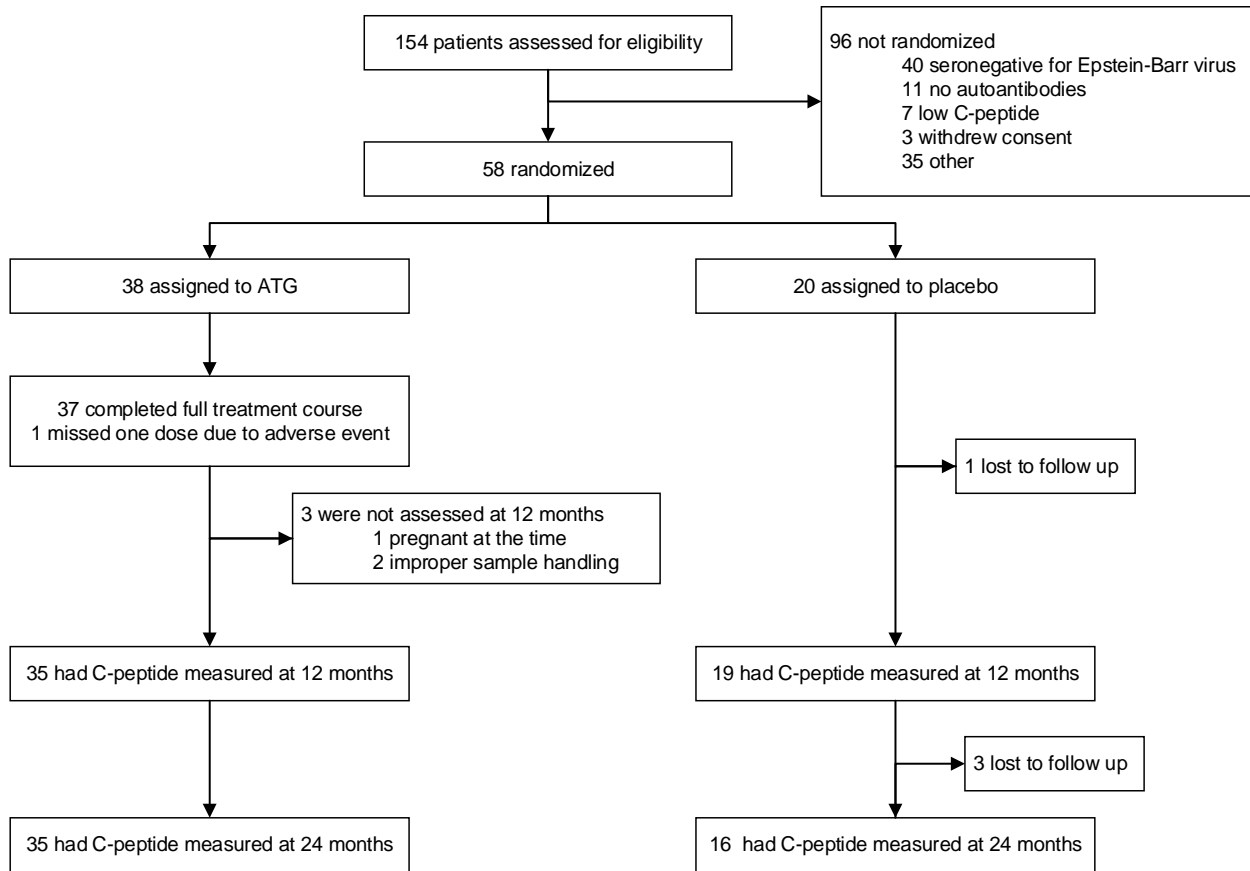

Supplement: 125_2016_3917_MOESM3_ESM.pdf [file 125_2016_3917_MOESM3_ESM.pdf]
