# Supplementary material
Source: PubMed Central journal article supplement (PMC4869699)

**Supplementary Figure 2 a-d.** Clinical responses from baseline to 24 months in participants assigned to ATG and placebo in the ITT sample. (a) Change in HbA1c. (b) Change in HbA1c by age group. (c) Change in exogenous insulin requirements. (d) Change in exogenous insulin requirements by age group. Gray, placebo group; black, treatment group. Circle, ITT population; square, 12-21 years; triangle 22-35 years. Data were analyzed by fitting ANCOVA models with adjustment for baseline levels and plotted as unadjusted means  $\pm$  95% CI. P-values are two-sided. For all analyses, the number of evaluable subjects (*n*) at each time point is shown in Supplementary Figure 1. \*\* $p < 0.01$  (younger vs older ATG group); \* $p < 0.05$  (younger vs older placebo group).

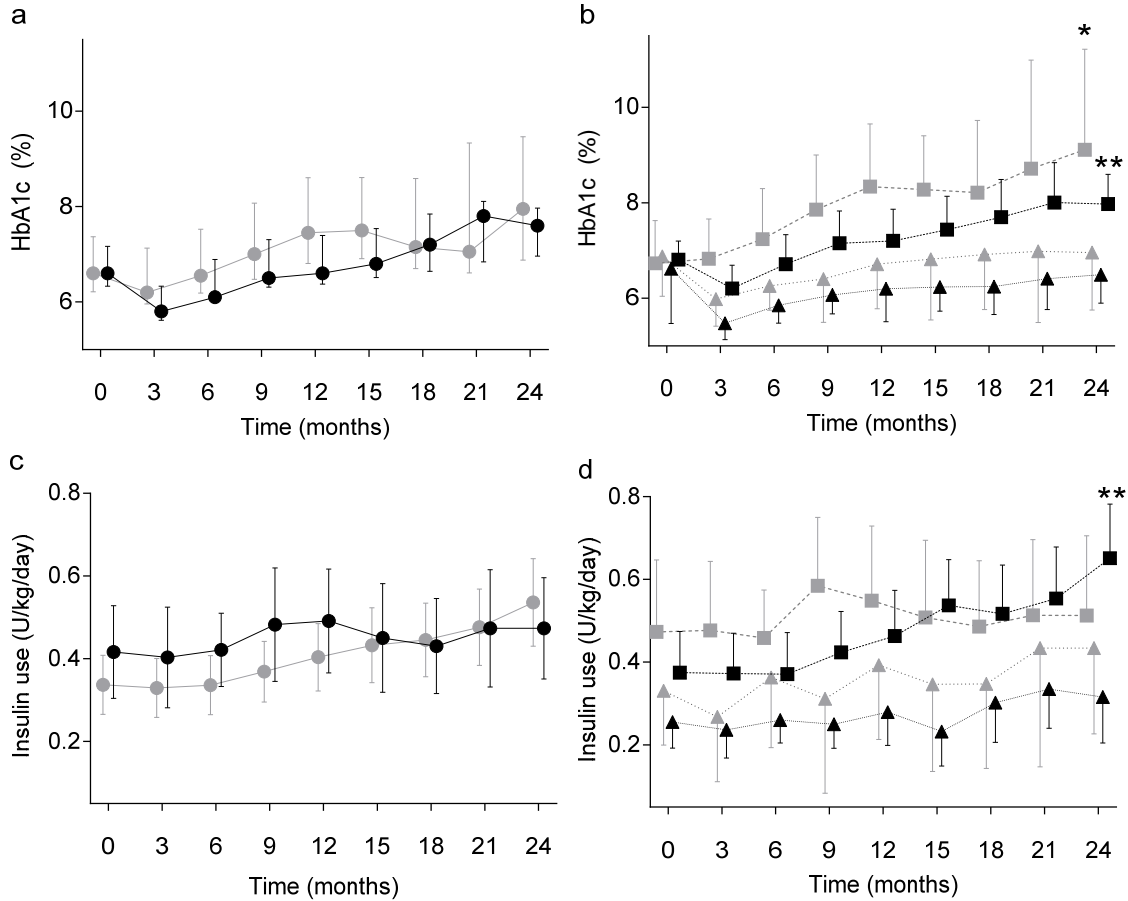

Supplement: 125_2016_3917_MOESM4_ESM.pdf [file 125_2016_3917_MOESM4_ESM.pdf]
