# Supplementary material
Source: PubMed Central journal article supplement (PMC4869699)
Supplement: 125_2016_3917_MOESM5_ESM.pdf [file 125_2016_3917_MOESM5_ESM.pdf]

**Supplementary Table 1.** Flow cytometry panels and cell subset gating strategy

| <b>Panel</b>             | <b>FITC<br/>(Fluorescein<br/>iso-<br/>thiocyanate)</b> | <b>PE<br/>(Phycoerythrin)</b> | <b>PerCP<br/>(Peridinin-<br/>chlorophyll-<br/>protein<br/>complex)</b> | <b>PECy7<br/>(Phycoerythrin/<br/>Cyanin<br/>complex)</b> | <b>APC<br/>(Allophycocyanin)</b> |
|--------------------------|--------------------------------------------------------|-------------------------------|------------------------------------------------------------------------|----------------------------------------------------------|----------------------------------|
| <b>Leukocyte subsets</b> | <b>CD14</b>                                            | <b>CD4</b>                    | <b>CD19</b>                                                            | <b>CD3</b>                                               | <b>HLA-DR</b>                    |
| CD3 T cells              | wbc→lymph→CD3+                                         |                               |                                                                        |                                                          |                                  |
| CD4 T cells              | wbc→lymph→CD3→CD4+                                     |                               |                                                                        |                                                          |                                  |
| CD8 T cells              | wbc→lymph→CD3→CD4neg                                   |                               |                                                                        |                                                          |                                  |
| CD19 B cells             | wbc→lymph→CD3neg→CD19+                                 |                               |                                                                        |                                                          |                                  |
| <b>T cell Subsets</b>    | <b>CD45RA</b>                                          | <b>CD45RO</b>                 | <b>CD8</b>                                                             | <b>CD4</b>                                               | <b>CD62L</b>                     |
| Naïve T cells            | wbc→lymph→CD4+ (or CD8+)→CD45RA+CD45ROneg→CD62Lhi      |                               |                                                                        |                                                          |                                  |
| Central Memory T cells   | wbc→lymph→CD4+ (or CD8+)→CD45RAnegCD45RO+→CD62Lhi      |                               |                                                                        |                                                          |                                  |
| Effector Memory T cells  | wbc→lymph→CD4+ (or CD8+)→CD45RAnegCD45RO+→CD62Llo      |                               |                                                                        |                                                          |                                  |
| <b>Treg</b>              | <b>CD62L</b>                                           | <b>CD25</b>                   | <b>CD4</b>                                                             | <b>CD3</b>                                               | <b>CD127</b>                     |
|                          | wbc→lymph→CD3+CD4+ →CD127loCD25hi                      |                               |                                                                        |                                                          |                                  |
| <b>Dendritic Cells</b>   | <b>CD11c</b>                                           |                               | <b>DUMP<br/>CD3, CD56,<br/>CD19, CD14</b>                              | <b>HLA-DR</b>                                            | <b>CD123</b>                     |
| Plasmacytoid DCs         | wbc→live cell gate→Dumpneg→HLA-DR+→CD123+CD11cneg      |                               |                                                                        |                                                          |                                  |
| Myeloid DCs              | wbc→live cell gate→Dumpneg→HLA-DR+→CD123negCD11c+      |                               |                                                                        |                                                          |                                  |
