# Supplementary material
Source: PubMed Central journal article supplement (PMC4869699)
Supplement: 125_2016_3917_MOESM7_ESM.pdf [file 125_2016_3917_MOESM7_ESM.pdf]

**Supplementary Table 3.** Total adverse events in ATG and placebo subjects from month 12 to month 24

|                                                 | <u>ATG</u><br><u>Participants</u><br>(n=38) | <u>Events</u> | <u>Placebo</u><br><u>Participants</u><br>(n=20) | <u>Events</u> | <u>Total</u><br><u>Participants</u><br>(n=58) | <u>Events</u> |
|-------------------------------------------------|---------------------------------------------|---------------|-------------------------------------------------|---------------|-----------------------------------------------|---------------|
| <b>Adverse Events</b>                           | 35 (92%)                                    | 387           | 17 (85%)                                        | 164           | 52 (90%)                                      | 551           |
| Metabolism and nutrition disorders              | 30 (79%)                                    | 263           | 12 (60%)                                        | 123           | 42 (72%)                                      | 386           |
| Hypoglycaemia                                   | 30 (79%)                                    | 260           | 10 (50%)                                        | 120           | 40<br>(69% 0)                                 | 380           |
| Hyperglycaemia                                  | 1 (3%)                                      | 1             | 1 (5%)                                          | 2             | 2 (3%)                                        | 3             |
| Diabetes mellitus inadequate control            | 1 (3%)                                      | 1             | 0                                               | 0             | 1 (2%)                                        | 1             |
| Diabetic ketoacidosis                           | 0                                           | 0             | 1 (5%)                                          | 1             | 1 (2%)                                        | 1             |
| Ketosis                                         | 1 (3%)                                      | 1             | 0                                               | 0             | 1 (2%)                                        | 1             |
| Infections and infestations                     | 22 (58%)                                    | 34            | 6 (30%)                                         | 9             | 28 (48%)                                      | 43            |
| Upper respiratory tract infection               | 9 (24%)                                     | 12            | 4 (20%)                                         | 6             | 13 (22%)                                      | 18            |
| Sinusitis                                       | 4 (11%)                                     | 5             | 0                                               | 0             | 4 (7%)                                        | 5             |
| Bronchitis                                      | 3 (8%)                                      | 4             | 0                                               | 0             | 3 (5%)                                        | 4             |
| Viral infection                                 | 3 (8%)                                      | 4             | 0                                               | 0             | 3 (5%)                                        | 4             |
| Acrodermatitis                                  | 1 (3%)                                      | 1             | 0                                               | 0             | 1 (2%)                                        | 1             |
| Adenoiditis                                     | 1 (3%)                                      | 1             | 0                                               | 0             | 1 (2%)                                        | 1             |
| Ear infection                                   | 1 (3%)                                      | 1             | 0                                               | 0             | 1 (2%)                                        | 1             |
| Gingival infection                              | 0                                           | 0             | 1 (5%)                                          | 1             | 1 (2%)                                        | 1             |
| Herpes virus infection                          | 1 (3%)                                      | 1             | 0                                               | 0             | 1 (2%)                                        | 1             |
| Influenza                                       | 1 (3%)                                      | 1             | 0                                               | 0             | 1 (2%)                                        | 1             |
| Nasopharyngitis                                 | 1 (3%)                                      | 1             | 0                                               | 0             | 1 (2%)                                        | 1             |
| Pharyngitis                                     | 0                                           | 0             | 1 (5%)                                          | 1             | 1 (2%)                                        | 1             |
| Pharyngitis streptococcal                       | 0                                           | 0             | 1 (5%)                                          | 1             | 1 (2%)                                        | 1             |
| Salmonellosis                                   | 1 (3%)                                      | 1             | 0                                               | 0             | 1 (2%)                                        | 1             |
| Tonsillitis                                     | 1 (3%)                                      | 1             | 0                                               | 0             | 1 (2%)                                        | 1             |
| Tooth infection                                 | 1 (3%)                                      | 1             | 0                                               | 0             | 1 (2%)                                        | 1             |
| Respiratory, thoracic and mediastinal disorders | 11 (29%)                                    | 11            | 4 (20%)                                         | 5             | 15 (26%)                                      | 16            |
| Cough                                           | 3 (8%)                                      | 3             | 1 (5%)                                          | 1             | 4 (7%)                                        | 4             |
| Oropharyngeal pain                              | 2 (5%)                                      | 2             | 2 (10%)                                         | 2             | 4 (7%)                                        | 4             |
| Sinus congestion                                | 2 (5%)                                      | 2             | 1 (5%)                                          | 1             | 3 (5%)                                        | 3             |
| Bronchospasm                                    | 0                                           | 0             | 1 (5%)                                          | 1             | 1 (2%)                                        | 1             |
| Dyspnoea                                        | 1 (3%)                                      | 1             | 0                                               | 0             | 1 (2%)                                        | 1             |
| Epistaxis                                       | 1 (3%)                                      | 1             | 0                                               | 0             | 1 (2%)                                        | 1             |
| Nasal congestion                                | 1 (3%)                                      | 1             | 0                                               | 0             | 1 (2%)                                        | 1             |
| Rhinitis allergic                               | 1 (3%)                                      | 1             | 0                                               | 0             | 1 (2%)                                        | 1             |
| Gastrointestinal disorders                      | 10 (26%)                                    | 14            | 2 (10%)                                         | 4             | 12 (20%)                                      | 18            |
| Abdominal pain upper                            | 1 (3%)                                      | 1             | 1 (5%)                                          | 1             | 2 (3%)                                        | 2             |
| Diarrhoea                                       | 1 (3%)                                      | 1             | 1 (5%)                                          | 1             | 2 (3%)                                        | 2             |
| Nausea                                          | 2 (5%)                                      | 2             | 0                                               | 0             | 2 (3%)                                        | 2             |
| Oral disorder                                   | 1 (3%)                                      | 3             | 0                                               | 0             | 1 (2%)                                        | 3             |
| Abdominal pain                                  | 0                                           | 0             | 1 (5%)                                          | 1             | 1 (2%)                                        | 1             |
| Constipation                                    | 1 (3%)                                      | 1             | 0                                               | 0             | 1 (2%)                                        | 1             |
| Dyspepsia                                       | 0                                           | 0             | 1 (5%)                                          | 1             | 1 (2%)                                        | 1             |
| Food poisoning                                  | 1 (3%)                                      | 1             | 0                                               | 0             | 1 (2%)                                        | 1             |
| Gastric ulcer                                   | 1 (3%)                                      | 1             | 0                                               | 0             | 1 (2%)                                        | 1             |
| Gastritis                                       | 1 (3%)                                      | 1             | 0                                               | 0             | 1 (2%)                                        | 1             |
| Gastrointestinal pain                           | 1 (3%)                                      | 1             | 0                                               | 0             | 1 (2%)                                        | 1             |

|                                                      | <u>ATG</u><br><u>Participants</u><br>(n=38) | <u>Events</u> | <u>Placebo</u><br><u>Participants</u><br>(n=20) | <u>Events</u> | <u>Total</u><br><u>Participants</u><br>(n=58) | <u>Events</u> |
|------------------------------------------------------|---------------------------------------------|---------------|-------------------------------------------------|---------------|-----------------------------------------------|---------------|
| Gastroesophageal reflux disease                      | 1 (3%)                                      | 1             | 0                                               | 0             | 1 (2%)                                        | 1             |
| Irritable bowel syndrome                             | 1 (3%)                                      | 1             | 0                                               | 0             | 1 (2%)                                        | 1             |
| Skin and subcutaneous tissue disorders               | 7 (18%)                                     | 9             | 5 (25%)                                         | 8             | 12 (20%)                                      | 17            |
| Lipohypertrophy                                      | 0                                           | 0             | 2 (10%)                                         | 4             | 2 (3%)                                        | 4             |
| Acne                                                 | 1 (3%)                                      | 1             | 1 (5%)                                          | 1             | 2 (3%)                                        | 2             |
| Rash                                                 | 1 (3%)                                      | 2             | 0                                               | 0             | 1 (2%)                                        | 2             |
| Skin lesion                                          | 1 (3%)                                      | 2             | 0                                               | 0             | 1 (2%)                                        | 2             |
| Dermatitis contact                                   | 0                                           | 0             | 1 (5%)                                          | 1             | 1 (2%)                                        | 1             |
| Eczema                                               | 0                                           | 0             | 1 (5%)                                          | 1             | 1 (2%)                                        | 1             |
| Erythema                                             | 1 (3%)                                      | 1             | 0                                               | 0             | 1 (2%)                                        | 1             |
| Hyperkeratosis                                       | 1 (3%)                                      | 1             | 0                                               | 0             | 1 (2%)                                        | 1             |
| Ingrowing nail                                       | 1 (3%)                                      | 1             | 0                                               | 0             | 1 (2%)                                        | 1             |
| Lipoatrophy                                          | 0                                           | 0             | 1 (5%)                                          | 1             | 1 (2%)                                        | 1             |
| Urticaria                                            | 1 (3%)                                      | 1             | 0                                               | 0             | 1 (2%)                                        | 1             |
| Injury, poisoning and procedural complications       | 11 (29%)                                    | 15            | 1 (5%)                                          | 1             | 12 (20%)                                      | 16            |
| Excoriation                                          | 2 (5%)                                      | 3             | 0                                               | 0             | 2 (3%)                                        | 3             |
| Foot fracture                                        | 2 (5%)                                      | 2             | 0                                               | 0             | 2 (3%)                                        | 2             |
| Joint sprain                                         | 2 (5%)                                      | 2             | 0                                               | 0             | 2 (3%)                                        | 2             |
| Concussion                                           | 1 (3%)                                      | 2             | 0                                               | 0             | 1 (2%)                                        | 2             |
| Skin laceration                                      | 1 (3%)                                      | 2             | 0                                               | 0             | 1 (2%)                                        | 2             |
| Ankle fracture                                       | 1 (3%)                                      | 1             | 0                                               | 0             | 1 (2%)                                        | 1             |
| Back injury                                          | 1 (3%)                                      | 1             | 0                                               | 0             | 1 (2%)                                        | 1             |
| Contusion                                            | 1 (3%)                                      | 1             | 0                                               | 0             | 1 (2%)                                        | 1             |
| Fibula fracture                                      | 1 (3%)                                      | 1             | 0                                               | 0             | 1 (2%)                                        | 1             |
| Sunburn                                              | 0                                           | 0             | 1 (5%)                                          | 1             | 1 (2%)                                        | 1             |
| Musculoskeletal and connective tissue disorders      | 5 (13%)                                     | 9             | 3 (15%)                                         | 3             | 8 (14%)                                       | 12            |
| Back pain                                            | 2 (5%)                                      | 2             | 3 (15%)                                         | 3             | 5 (9%)                                        | 5             |
| Arthralgia                                           | 2 (5%)                                      | 2             | 0                                               | 0             | 2 (3%)                                        | 2             |
| Patellofemoral pain syndrome                         | 1 (3%)                                      | 2             | 0                                               | 0             | 1 (2%)                                        | 2             |
| Muscle spasms                                        | 1 (3%)                                      | 1             | 0                                               | 0             | 1 (2%)                                        | 1             |
| Myalgia                                              | 1 (3%)                                      | 1             | 0                                               | 0             | 1 (2%)                                        | 1             |
| Scoliosis                                            | 1 (3%)                                      | 1             | 0                                               | 0             | 1 (2%)                                        | 1             |
| General disorders and administration site conditions | 4 (11%)                                     | 4             | 2 (10%)                                         | 4             | 6 (10%)                                       | 8             |
| Influenza like illness                               | 1 (3%)                                      | 1             | 2 (10%)                                         | 2             | 3 (5%)                                        | 3             |
| Fatigue                                              | 1 (3%)                                      | 1             | 1 (5%)                                          | 1             | 2 (3%)                                        | 2             |
| Chest pain                                           | 1 (3%)                                      | 1             | 0                                               | 0             | 1 (2%)                                        | 1             |
| Malaise                                              | 1 (3%)                                      | 1             | 0                                               | 0             | 1 (2%)                                        | 1             |
| Pyrexia                                              | 0                                           | 0             | 1 (5%)                                          | 1             | 1 (2%)                                        | 1             |
| Blood and lymphatic system disorders                 | 3 (8%)                                      | 5             | 2 (10%)                                         | 2             | 5 (9%)                                        | 7             |
| Neutropenia                                          | 2 (5%)                                      | 2             | 1 (5%)                                          | 1             | 3 (5%)                                        | 3             |
| Leukopenia                                           | 2 (5%)                                      | 2             | 0                                               | 0             | 2 (3%)                                        | 2             |
| Lymphadenopathy                                      | 0                                           | 0             | 1 (5%)                                          | 1             | 1 (2%)                                        | 1             |
| Lymphopenia                                          | 1 (3%)                                      | 1             | 0                                               | 0             | 1 (2%)                                        | 1             |
| Psychiatric disorders                                | 2 (5%)                                      | 3             | 2 (10%)                                         | 3             | 4 (7%)                                        | 6             |
| Depression                                           | 2 (5%)                                      | 3             | 2 (10%)                                         | 2             | 4 (7%)                                        | 5             |
| Suicidal ideation                                    | 0                                           | 0             | 1 (5%)                                          | 1             | 1 (2%)                                        | 1             |
| Immune system disorders                              | 4 (11%)                                     | 5             | 0                                               | 0             | 4 (7%)                                        | 5             |

|                                                                      | <u>ATG</u><br><u>Participants</u><br>(n=38) | <u>Events</u> | <u>Placebo</u><br><u>Participants</u><br>(n=20) | <u>Events</u> | <u>Total</u><br><u>Participants</u><br>(n=58) | <u>Events</u> |
|----------------------------------------------------------------------|---------------------------------------------|---------------|-------------------------------------------------|---------------|-----------------------------------------------|---------------|
| Seasonal allergy                                                     | 4 (11%)                                     | 5             | 0                                               | 0             | 4 (7%)                                        | 5             |
| Nervous system disorders                                             | 3 (8%)                                      | 3             | 1 (5%)                                          | 1             | 4 (7%)                                        | 4             |
| Headache                                                             | 2 (5%)                                      | 2             | 1 (5%)                                          | 1             | 3 (5%)                                        | 3             |
| Presyncope                                                           | 1 (3%)                                      | 1             | 0                                               | 0             | 1 (2%)                                        | 1             |
| Investigations                                                       | 2 (5%)                                      | 2             | 1 (5%)                                          | 1             | 3 (5%)                                        | 3             |
| Blood immunoglobulin A decreased                                     | 1 (3%)                                      | 1             | 0                                               | 0             | 1 (2%)                                        | 1             |
| Glycosylated haemoglobin increased                                   | 0                                           | 0             | 1 (5%)                                          | 1             | 1 (2%)                                        | 1             |
| Urine albumin/creatinine ratio increased                             | 1 (3%)                                      | 1             | 0                                               | 0             | 1 (2%)                                        | 1             |
| Eye disorders                                                        | 2 (5%)                                      | 2             | 0                                               | 0             | 2 (3%)                                        | 2             |
| Dry eye                                                              | 1 (3%)                                      | 1             | 0                                               | 0             | 1 (2%)                                        | 1             |
| Lacrimation increased                                                | 1 (3%)                                      | 1             | 0                                               | 0             | 1 (2%)                                        | 1             |
| Neoplasms benign, malignant and unspecified (incl. cysts and polyps) | 2 (5%)                                      | 2             | 0                                               | 0             | 2 (3%)                                        | 2             |
| Acrochordon                                                          | 1 (3%)                                      | 1             | 0                                               | 0             | 1 (2%)                                        | 1             |
| Melanocytic naevus                                                   | 1 (3%)                                      | 1             | 0                                               | 0             | 1 (2%)                                        | 1             |
| Reproductive system and breast disorders                             | 2 (5%)                                      | 2             | 0                                               | 0             | 2 (3%)                                        | 2             |
| Amenorrhoea                                                          | 1 (3%)                                      | 1             | 0                                               | 0             | 1 (2%)                                        | 1             |
| Ovarian cyst                                                         | 1 (3%)                                      | 1             | 0                                               | 0             | 1 (2%)                                        | 1             |
| Cardiac disorders                                                    | 1 (3%)                                      | 1             | 0                                               | 0             | 1 (2%)                                        | 1             |
| Aortic valve incompetence                                            | 1 (3%)                                      | 1             | 0                                               | 0             | 1 (2%)                                        | 1             |
| Endocrine disorders                                                  | 1 (3%)                                      | 1             | 0                                               | 0             | 1 (2%)                                        | 1             |
| Thyroid mass                                                         | 1 (3%)                                      | 1             | 0                                               | 0             | 1 (2%)                                        | 1             |
| Pregnancy, puerperium and perinatal conditions                       | 1 (3%)                                      | 1             | 0                                               | 0             | 1 (2%)                                        | 1             |
| Pregnancy                                                            | 1 (3%)                                      | 1             | 0                                               | 0             | 1 (2%)                                        | 1             |
| Renal and urinary disorders                                          | 1 (3%)                                      | 1             | 0                                               | 0             | 1 (2%)                                        | 1             |
| Nephrolithiasis                                                      | 1 (3%)                                      | 1             | 0                                               | 0             | 1 (2%)                                        | 1             |
