# Supplementary material
Source: PubMed Central journal article supplement (PMC4869699)
Supplement: 125_2016_3917_MOESM8_ESM.pdf [file 125_2016_3917_MOESM8_ESM.pdf]

**Supplementary Table 4.** Serious adverse events in ATG- and placebo-treated subjects

|                                      | <u>ATG</u><br><u>Participants</u><br>(n=38) | <u>Events</u> | <u>Placebo</u><br><u>Participants</u><br>(n=20) | <u>Events</u> |
|--------------------------------------|---------------------------------------------|---------------|-------------------------------------------------|---------------|
| Participants with at least one SAE   | 5 (13%)                                     | 7             | 2 (10%)                                         | 3             |
| Grade 1                              | 0                                           | 0             | 0                                               | 0             |
| Grade 2                              | 1 (3%)                                      | 1             | 1 (5%)                                          | 1             |
| Grade 3                              | 2 (5%)                                      | 3             | 1 (5%)                                          | 2             |
| Grade 4                              | 2 (5%)                                      | 3             | 0                                               | 0             |
|                                      |                                             |               |                                                 |               |
| Depression                           | 1 (3%)                                      | 2             | 1 (5%)                                          | 1             |
| Diabetes mellitus inadequate control | 1 (3%)                                      | 1             | 0                                               | 0             |
| Diabetic ketoacidosis                | 0                                           | 0             | 1 (5%)                                          | 1             |
| Hyperglycaemia                       | 1 (3%)                                      | 1             | 0                                               | 0             |
| Hypoglycaemia                        | 1 (3%)                                      | 1             | 0                                               | 0             |
| Ketosis                              | 1 (3%)                                      | 1             | 0                                               | 0             |
| Salmonellosis                        | 1 (3%)                                      | 1             | 0                                               | 0             |
| Suicidal ideation                    | 0                                           | 0             | 1 (5%)                                          | 1             |
