# Supplementary material
Source: PubMed Central journal article supplement (PMC4869699)
Supplement: 125_2016_3917_MOESM9_ESM.pdf [file 125_2016_3917_MOESM9_ESM.pdf]

**Supplementary Table 5.** Adverse events in 15% or more of participants up to month 24 by age group

|                                                      | <u>ATG</u><br><u>Participants</u><br>12-21<br>(n=26) | <u>Events</u> | <u>ATG</u><br><u>Participants</u><br>22-35<br>(n=12) | <u>Events</u> | <u>Placebo</u><br><u>Participants</u><br>12-21<br>(n=12) | <u>Events</u> | <u>Placebo</u><br><u>Participants</u><br>22-35<br>(n=8) | <u>Events</u> |
|------------------------------------------------------|------------------------------------------------------|---------------|------------------------------------------------------|---------------|----------------------------------------------------------|---------------|---------------------------------------------------------|---------------|
| Total Number of Adverse Events                       | 688                                                  |               | 460                                                  |               | 259                                                      |               | 156                                                     |               |
| Grade 1                                              | 26 (100%)                                            | 217           | 12 (100%)                                            | 133           | 11 (91.7%)                                               | 107           | 7 (87.5%)                                               | 72            |
| Grade 2                                              | 25 (96.2%)                                           | 348           | 12 (100%)                                            | 256           | 10 (83.3%)                                               | 122           | 8 (100%)                                                | 78            |
| Grade 3                                              | 19 (73.1%)                                           | 61            | 12 (100%)                                            | 51            | 9 (75.0%)                                                | 25            | 3 (37.5%)                                               | 5             |
| Grade 4                                              | 26 (100%)                                            | 59            | 12 (100%)                                            | 19            | 3 (25.0%)                                                | 4             | 1 (12.5%)                                               | 1             |
| Grade 5                                              | 0                                                    | 0             | 0                                                    | 0             | 0 (0%)                                                   | 0             | 0                                                       | 0             |
| Metabolism and nutrition disorders                   | 23 (88.5%)                                           | 284           | 12 (100%)                                            | 229           | 9 (75.0%)                                                | 127           | 7 (87.5%)                                               | 79            |
| Hypoglycaemia                                        | 20 (76.9%)                                           | 268           | 12 (100%)                                            | 227           | 9 (75.0%)                                                | 122           | 7 (87.5%)                                               | 79            |
| Hyperglycaemia                                       | 7 (26.9%)                                            | 11            | 1 (8.3%)                                             | 1             | 1 (8.3%)                                                 | 4             | 0                                                       | 0             |
| Infections and infestations                          | 19 (73.1%)                                           | 51            | 10 (83.3%)                                           | 37            | 9 (75.0%)                                                | 23            | 5 (62.5%)                                               | 10            |
| Upper respiratory tract infection                    | 11 (42.3%)                                           | 22            | 5 (41.7%)                                            | 10            | 4 (33.3%)                                                | 12            | 3 (37.5%)                                               | 4             |
| Viral infection                                      | 4 (15.4%)                                            | 9             | 1 (8.3%)                                             | 2             | 2 (16.7%)                                                | 2             | 1 (12.5%)                                               | 1             |
| Blood and lymphatic system disorders                 | 26 (100%)                                            | 80            | 12 (100%)                                            | 43            | 2 (16.7%)                                                | 4             | 2 (25.0%)                                               | 2             |
| CD4 lymphocytes decreased                            | 26 (100%)                                            | 26            | 12 (100%)                                            | 12            | 0 (0%)                                                   | 0             | 0                                                       | 0             |
| Lymphopenia                                          | 26 (100%)                                            | 31            | 12 (100%)                                            | 17            | 0 (0%)                                                   | 0             | 0                                                       | 0             |
| Leukopenia                                           | 10 (38.5%)                                           | 13            | 4 (33.3%)                                            | 7             | 0 (0%)                                                   | 0             | 0                                                       | 0             |
| Neutropenia                                          | 6 (23.1%)                                            | 6             | 3 (25.0%)                                            | 4             | 1 (8.3%)                                                 | 3             | 1 (12.5%)                                               | 1             |
| Immune system disorders                              | 26 (100%)                                            | 56            | 12 (100%)                                            | 28            | 1 (8.3%)                                                 | 1             | 2 (25.0%)                                               | 2             |
| Cytokine release syndrome                            | 25 (96.2%)                                           | 25            | 12 (100%)                                            | 12            | 1 (8.3%)                                                 | 1             | 0                                                       | 0             |
| Serum sickness                                       | 26 (100%)                                            | 27            | 12 (100%)                                            | 12            | 0 (0%)                                                   | 0             | 0                                                       | 0             |
| Seasonal allergy                                     | 4 (15.4%)                                            | 4             | 3 (25.0%)                                            | 4             | 0 (0%)                                                   | 0             | 2 (25.0%)                                               | 2             |
| Skin and subcutaneous tissue disorders               | 17 (65.4%)                                           | 25            | 9 (75.0%)                                            | 19            | 6 (50.0%)                                                | 21            | 4 (50.0%)                                               | 5             |
| Rash                                                 | 2 (7.7%)                                             | 3             | 5 (41.7%)                                            | 5             | 1 (8.3%)                                                 | 2             | 1 (12.5%)                                               | 1             |
| Acne                                                 | 7 (26.9%)                                            | 8             |                                                      |               | 1 (8.3%)                                                 | 1             |                                                         |               |
| Pruritus                                             | 2 (7.7%)                                             | 2             | 2 (16.7%)                                            | 2             | 1 (8.3%)                                                 | 1             | 2 (25.0%)                                               | 3             |
| Dermatitis contact                                   | 1 (3.8%)                                             | 1             | 1 (8.3%)                                             | 1             | 2 (16.7%)                                                | 2             | 1 (12.5%)                                               | 1             |
| Gastrointestinal disorders                           | 18 (69.2%)                                           | 33            | 6 (50.0%)                                            | 18            | 6 (50.0%)                                                | 8             | 5 (62.5%)                                               | 12            |
| Nausea                                               | 5 (19.2%)                                            | 5             | 2 (16.7%)                                            | 3             | 3 (25.0%)                                                | 4             | 2 (25.0%)                                               | 3             |
| Diarrhoea                                            | 4 (15.4%)                                            | 4             | 1 (8.3%)                                             | 1             | 1 (8.3%)                                                 | 1             | 2 (25.0%)                                               | 2             |
| Vomiting                                             | 3 (11.5%)                                            | 4             | 0                                                    | 0             | 1 (8.3%)                                                 | 1             | 2 (25.0%)                                               | 2             |
| Dyspepsia                                            | 1 (3.8%)                                             | 1             | 1 (8.3%)                                             | 1             | 1 (8.3%)                                                 | 1             | 2 (25.0%)                                               | 2             |
| Nervous system disorders                             | 16 (61.5%)                                           | 21            | 8 (66.7%)                                            | 20            | 7 (58.3%)                                                | 17            | 4 (50.0%)                                               | 6             |
| Headache                                             | 11 (42.3%)                                           | 14            | 7 (58.3%)                                            | 11            | 7 (58.3%)                                                | 11            | 3 (37.5%)                                               | 4             |
| General disorders and administration site conditions | 17 (65.4%)                                           | 19            | 9 (75.0%)                                            | 17            | 4 (33.3%)                                                | 9             | 4 (50.0%)                                               | 9             |

|                                                 |            |    |           |    |           |    |           |    |
|-------------------------------------------------|------------|----|-----------|----|-----------|----|-----------|----|
| Fatigue                                         | 1 (3.8%)   | 1  | 2 (16.7%) | 3  | 2 (16.7%) | 3  | 2 (25.0%) | 2  |
| Pyrexia                                         | 5 (19.2%)  | 5  | 1 (8.3%)  | 1  | 0 (0%)    | 0  | 1 (12.5%) | 1  |
| Influenza like illness                          | 0 (0%)     | 0  | 2 (16.7%) | 2  | 1 (8.3%)  | 1  | 2 (25.0%) | 2  |
| Respiratory, thoracic and mediastinal disorders | 18 (69.2%) | 34 | 5 (41.7%) | 8  | 7 (58.3%) | 16 | 4 (50.0%) | 10 |
| Oropharyngeal pain                              | 7 (26.9%)  | 10 | 2 (16.7%) | 3  | 3 (25.0%) | 4  | 2 (25.0%) | 2  |
| Cough                                           | 7 (26.9%)  | 9  | 1 (8.3%)  | 1  | 2 (16.7%) | 2  | 2 (25.0%) | 3  |
| Nasal congestion                                | 2 (7.7%)   | 3  | 1 (8.3%)  | 1  | 1 (8.3%)  | 2  | 2 (25.0%) | 2  |
| Rhinorrhoea                                     | 1 (3.8%)   | 1  | 0         | 0  | 2 (16.7%) | 2  | 1 (12.5%) | 1  |
| Musculoskeletal and connective tissue disorders | 11 (42.3%) | 16 | 3 (25.0%) | 10 | 6 (50.0%) | 10 | 5 (62.5%) | 10 |
| Back pain                                       | 2 (7.7%)   | 2  | 2 (16.7%) | 3  | 1 (8.3%)  | 1  | 4 (50.0%) | 5  |
| Arthralgia                                      | 4 (15.4%)  | 4  | 0         | 0  | 3 (25.0%) | 4  | 0         | 0  |
| Musculoskeletal pain                            | 1 (3.8%)   | 1  | 0         | 0  | 0 (0%)    | 0  | 3 (37.5%) | 3  |
| Psychiatric disorders                           | 7 (26.9%)  | 13 | 2 (16.7%) | 2  | 7 (58.3%) | 12 | 0         | 0  |
| Depression                                      | 4 (15.4%)  | 7  | 0         | 0  | 4 (33.3%) | 4  | 0         | 0  |
| Vascular disorders                              | 4 (15.4%)  | 6  | 0         | 0  | 3 (25.0%) | 3  | 2 (25.0%) | 2  |
| Hypotension                                     | 0 (0%)     | 0  | 0         | 0  | 1 (8.3%)  | 1  | 2 (25.0%) | 2  |
